# Supplementary material
Source: PubMed Central journal article supplement (PMC115302)
Supplement: nar_30_10_e48__1.pdf [file nar_30_10_e48__1.pdf]

**Table 1**

Fold changes of sample pairs as determined by QRTPCR (Fp) and oligonucleotide microarray (Fa(oligo)) using Microarray Suite 5.0

| Gene                      | E1/C1 |                            | E1/C2 |                            | E1/C3 |                            | E2/C1 |                            | E2/C2 |                            | E2/C3 |                            | E3/C1 |                            | E3/C2 |                            | E3/C3 |                            |
|---------------------------|-------|----------------------------|-------|----------------------------|-------|----------------------------|-------|----------------------------|-------|----------------------------|-------|----------------------------|-------|----------------------------|-------|----------------------------|-------|----------------------------|
|                           | PCR   | Oligo array                |
|                           |       |                            |       |                            |       |                            |       |                            |       |                            |       |                            |       |                            |       |                            |       |                            |
| LRG-21                    | 102.1 | I 24.3<br>I 21.1           | 39.7  | I 24.3<br>I 19.7           | 72.9  | I 24.3<br>I 24.3           | 63.7  | I 21.1<br>I 19.7           | 24.8  | I 21.1<br>I 17.1           | 45.5  | I 21.1<br>I 22.6           | 71.1  | I 19.7<br>I 19.7           | 27.6  | I 21.1<br>I 19.7           | 50.8  | I 21.1<br>I 24.3           |
| egr1                      | 527.6 | I 19.7                     | 678.1 | I 13.9                     | 368.4 | I 13.0                     | 705.0 | I 14.9                     | 906.0 | I 10.6                     | 492.2 | I 9.8                      | 582.8 | I 14.9                     | 749.0 | I 11.3                     | 406.9 | I 10.6                     |
| Nr4a1 (nur77)             | 180.1 | I 48.5                     | 79.3  | I 52.0                     | 54.6  | I 84.4                     | 107.1 | I 39.4                     | 47.2  | I 45.3                     | 32.5  | I 68.6                     | 154.0 | I 36.8                     | 67.8  | I 42.2                     | 46.7  | I 68.6                     |
| ler2 (pip92)              | 16.1  | I 14.9                     | 24.1  | I 16.0                     | 19.3  | I 14.9                     | 22.1  | I 16.0                     | 32.9  | I 17.1                     | 26.4  | I 16.0                     | 16.9  | I 17.1                     | 25.3  | I 17.1                     | 20.3  | I 17.1                     |
| RGS2                      | 9.8   | I 3.5                      | 10.9  | I 5.3                      | 10.0  | I 4.3                      | 7.5   | I 2.5                      | 8.4   | I 3.7                      | 7.7   | I 2.8                      | 7.2   | I 3.5                      | 8.1   | I 5.3                      | 7.4   | I 3.7                      |
| c-jun                     | 9.2   | I 4.6                      | 8.5   | I 4.0                      | 7.1   | I 8.6                      | 9.4   | I 4.9                      | 8.7   | I 4.6                      | 7.2   | I 9.8                      | 7.8   | I 5.7                      | 7.2   | I 4.3                      | 6.0   | I 8.0                      |
| TSC-22                    | 3.4   | I 2.3                      | 3.4   | I 2.3                      | 3.0   | I 2.3                      | 2.9   | I 1.6                      | 2.8   | I 1.7                      | 2.5   | I 1.9                      | 2.6   | I 1.6                      | 2.6   | I 1.7                      | 2.3   | I 1.9                      |
| gamma-actin               | 2.4   | I 1.6                      | 3.0   | I 1.5                      | 3.6   | I 1.5                      | 2.1   | I 1.3                      | 2.7   | NC 1.1                     | 3.3   | NC 1.1                     | 1.9   | I 1.2                      | 2.4   | NC 1.1                     | 2.8   | NC 1.1                     |
| beta-actin                | 1.7   | I 1.6<br>I 1.6<br>I 1.5    | 1.6   | I 1.6<br>I 1.4             | 1.6   | NC 1.3<br>I 1.3<br>NC 1.3  | 0.9   | I 1.3<br>I 1.3<br>NC 1.2   | 0.8   | I 1.3<br>I 1.2<br>NC 1.4   | 0.9   | NC 1.1<br>NC 1.1<br>NC 1.2 | 1.5   | I 1.1<br>I 1.1<br>I 1.1    | 1.4   | I 1.1<br>NC 1.0<br>NC 1.2  | 1.4   | NC 0.9<br>NC 0.9<br>NC 1.0 |
| KLF4                      | 1.8   | I 3.2                      | 3.1   | I 3.0                      | 3.0   | I 2.8                      | 1.9   | I 2.1                      | 3.4   | I 2.5                      | 3.2   | I 1.7                      | 1.9   | I 2.3                      | 3.3   | I 2.6                      | 3.1   | I 2.1                      |
| Period1                   | 4.7   | I 1.7                      | 7.6   | I 2.5                      | 5.8   | I 2.3                      | 5.0   | I 1.9                      | 8.1   | I 2.3                      | 6.2   | I 2.0                      | 3.1   | I 2.5                      | 5.1   | I 3.2                      | 3.9   | I 2.8                      |
| Ptp4a1                    | 1.6   | I 1.4                      | 1.7   | I 1.5                      | 2.0   | I 1.5                      | 1.7   | I 1.4                      | 1.8   | I 1.4                      | 2.0   | I 1.4                      | 1.5   | I 1.4                      | 1.6   | I 1.5                      | 1.8   | I 1.5                      |
| gly96                     | 3.1   | I 2.0                      | 4.2   | NC 1.4                     | 3.8   | I 1.4                      | 3.8   | I 2.5                      | 5.1   | I 1.7                      | 4.6   | I 1.9                      | 3.0   | I 2.1                      | 4.0   | I 1.6                      | 3.7   | NC 1.6                     |
| I-kappa B                 | 2.8   | I 3.2<br>I 2.5             | 3.3   | I 2.5<br>I 2.5             | 2.6   | I 2.5<br>I 2.6             | 2.4   | I 2.6<br>I 2.5             | 2.7   | I 2.1<br>I 2.3             | 2.2   | I 2.1<br>I 2.3             | 2.7   | I 3.0<br>I 2.3             | 3.2   | I 2.3<br>I 2.1             | 2.5   | I 2.5<br>I 2.6             |
| Gem                       | 4.4   | I 2.6                      | 5.1   | I 2.8                      | 4.5   | I 3.0                      | 3.4   | I 2.5                      | 3.9   | I 2.5                      | 3.4   | I 2.5                      | 3.1   | I 2.5                      | 3.5   | I 2.1                      | 3.1   | I 2.6                      |
| egr2                      | 269.3 | I 11.3                     | 322.5 | I 18.4                     | 346.3 | I 12.1                     | 331.1 | I 11.3                     | 396.5 | I 19.7                     | 425.7 | I 13.9                     | 224.2 | I 8.6                      | 268.5 | I 13.9                     | 288.3 | I 10.6                     |
| ptpn16 (MKP1)             | 4.0   | I 2.6                      | 4.8   | I 3.2                      | 3.6   | I 2.8                      | 5.3   | I 3.0                      | 6.2   | I 3.7                      | 4.8   | I 3.5                      | 4.0   | I 3.2                      | 4.7   | I 3.7                      | 3.6   | I 3.5                      |
| SCL                       | 2.1   | NC 1.3                     | 2.5   | I 1.6                      | 2.2   | I 2.0                      | 2.0   | NC 1.3                     | 2.4   | I 1.6                      | 2.2   | I 1.7                      | 1.8   | I 1.4                      | 2.1   | I 1.6                      | 1.9   | I 1.9                      |
| glucose transport protein | 1.2   | NC 1.1                     | 1.4   | NC 1.1                     | 1.3   | NC 1.3                     | 1.6   | NC 0.9                     | 1.8   | NC 1.0                     | 1.8   | NC 1.0                     | 1.1   | NC 1.1                     | 1.3   | NC 1.0                     | 1.2   | NC 1.5                     |
| junD                      | 1.4   | NC 1.5                     | 1.7   | NC 1.5                     | 1.9   | NC 1.3                     | 1.1   | NC 1.3                     | 1.3   | NC 1.2                     | 1.5   | NC 1.1                     | 0.9   | I 1.2                      | 1.1   | NC 1.2                     | 1.3   | NC 1.0                     |
| mthfd2                    | 1.4   | NC 1.1                     | 1.4   | NC 1.2                     | 1.1   | NC 1.2                     | 1.7   | NC 1.0                     | 1.6   | NC 1.1                     | 1.3   | NC 1.1                     | 1.3   | NC 1.0                     | 1.3   | NC 1.1                     | 1.1   | NC 1.1                     |
| Stat3B                    | 1.0   | NC 1.1                     | 1.3   | NC 1.1                     | 1.4   | NC 1.0                     | 0.7   | NC 1.1                     | 0.8   | NC 1.0                     | 0.9   | NC 0.9                     | 1.0   | NC 1.1                     | 1.2   | NC 1.1                     | 1.3   | NC 1.1                     |
| Nrf2                      | 1.2   | NC 1.2                     | 1.6   | I 1.5                      | 1.4   | NC 1.4                     | 1.1   | NC 1.1                     | 1.4   | I 1.2                      | 1.3   | NC 1.2                     | 0.9   | NC 1.0                     | 1.2   | I 1.2                      | 1.1   | NC 1.1                     |
| Gata2                     | 1.3   | NC 1.0                     | 1.9   | NC 0.9                     | 1.1   | NC 1.0                     | 1.3   | NC 1.1                     | 1.8   | NC 0.9                     | 1.1   | NC 1.0                     | 1.1   | NC 1.1                     | 1.6   | NC 0.9                     | 1.0   | NC 1.0                     |
| Gata6                     | 1.0   | NC 0.9<br>NC 0.3           | 1.0   | NC 0.8<br>NC 0.5           | 0.9   | NC 0.7<br>NC 0.2           | 1.2   | NC 0.9<br>NC 0.8           | 1.3   | D 0.8<br>NC 1.2            | 1.0   | NC 0.8<br>NC 0.4           | 0.8   | NC 0.9<br>NC 0.9           | 0.8   | NC 0.8<br>NC 1.5           | 0.7   | NC 0.8<br>NC 0.5           |
| chloride channel 3        | 1.2   | NC 0.8<br>NC 1.0<br>NC 1.1 | 0.9   | NC 0.8<br>NC 1.1<br>NC 1.1 | 1.0   | NC 0.8<br>NC 1.1<br>NC 1.2 | 1.3   | NC 1.0<br>NC 0.9<br>NC 1.1 | 1.1   | NC 1.0<br>NC 1.0<br>NC 1.0 | 1.2   | NC 0.9<br>NC 1.1<br>NC 1.1 | 1.1   | NC 1.1<br>NC 1.1<br>NC 1.2 | 0.9   | NC 1.1<br>NC 1.1<br>NC 1.1 | 1.0   | NC 1.1<br>NC 1.3<br>I 1.3  |
| Cox8a                     | 1.2   | NC 1.6                     | 1.5   | NC 1.1                     | 1.4   | NC 1.6                     | 1.0   | NC 1.1                     | 1.3   | NC 0.9                     | 1.2   | NC 1.1                     | 0.9   | NC 0.7                     | 1.1   | NC 0.5                     | 1.1   | NC 0.6                     |
| elongation factor 2       | 0.8   | NC 1.1                     | 0.8   | NC 0.9                     | 1.1   | NC 1.1                     | 0.8   | NC 1.0                     | 0.8   | NC 0.9                     | 1.2   | NC 0.9                     | 2.3   | NC 1.1                     | 2.4   | NC 1.0                     | 3.4   | NC 1.0                     |
| Fatty acid synthase       | 1.2   | NC 1.1                     | 1.5   | NC 1.0                     | 1.2   | NC 1.1                     | 1.1   | NC 1.0                     | 1.4   | D 0.9                      | 1.1   | NC 0.9                     | 2.0   | NC 1.1                     | 2.5   | NC 1.0                     | 2.0   | NC 1.0                     |
| G-binding protein         | 1.1   | NC 0.9                     | 1.2   | NC 0.9                     | 1.1   | NC 0.9                     | 1.2   | NC 1.0                     | 1.2   | NC 0.9                     | 1.2   | NC 1.0                     | 0.9   | NC 1.1                     | 0.9   | NC 0.9                     | 0.9   | NC 1.1                     |
| growth factor-induced     | 1.0   | NC 1.3                     | 1.0   | NC 1.2                     | 1.0   | NC 1.5                     | 1.1   | NC 3.0                     | 1.0   | NC 2.8                     | 1.0   | NC 3.5                     | 0.8   | NC 2.3                     | 0.8   | NC 2.5                     | 0.8   | NC 2.5                     |
| Hdac1                     | 1.3   | NC 0.9                     | 1.2   | NC 0.9                     | 1.2   | NC 0.9                     | 1.2   | NC 0.9                     | 1.1   | NC 0.9                     | 1.1   | NC 0.9                     | 1.0   | NC 0.9                     | 0.9   | NC 0.9                     | 0.9   | NC 0.9                     |
| HSP86-1                   | 1.3   | NC 1.2                     | 1.8   | I 1.3                      | 1.5   | I 1.3                      | 1.2   | NC 1.1                     | 1.7   | I 1.2                      | 1.4   | NC 1.1                     | 1.2   | NC 1.0                     | 1.7   | NC 1.1                     | 1.4   | NC 1.1                     |
| Na,K-ATPase               | 1.1   | NC 1.1                     | 1.6   | NC 1.1                     | 1.1   | NC 1.1                     | 1.2   | NC 1.1                     | 1.6   | NC 1.1                     | 1.1   | NC 1.1                     | 1.0   | NC 1.1                     | 1.4   | NC 1.1                     | 0.9   | NC 1.0                     |
| 26S proteasome            | 1.1   | NC 1.1                     | 1.3   | NC 1.2                     | 1.1   | I 1.1                      | 1.1   | NC 0.9                     | 1.3   | NC 1.1                     | 1.1   | NC 1.1                     | 1.0   | NC 0.9                     | 1.2   | NC 1.0                     | 1.0   | NC 1.0                     |
| PRL2                      | 1.3   | NC 1.1                     | 1.3   | NC 1.1                     | 1.3   | NC 1.1                     | 1.2   | NC 0.9                     | 1.2   | NC 1.0                     | 1.2   | NC 1.0                     | 1.1   | NC 0.9                     | 1.1   | NC 0.9                     | 1.0   | NC 1.1                     |
| small GTP-binding protein | 1.4   | NC 1.2                     | 1.6   | NC 1.2                     | 1.4   | NC 1.1                     | 1.3   | NC 1.1                     | 1.5   | NC 1.1                     | 1.3   | NC 1.1                     | 1.0   | NC 1.0                     | 1.2   | NC 1.1                     | 1.1   | NC 0.9                     |
| ribosomal protein L37     | 1.4   | NC 0.9                     | 5.1   | NC 0.8                     | 3.4   | NC 0.9                     | 1.2   | NC 0.9                     | 4.5   | D 0.9                      | 2.9   | D 0.9                      | 0.4   | NC 1.1                     | 1.4   | NC 1.0                     | 0.9   | NC 1.1                     |
| ribosomal protein L7      | 1.1   | NC 1.1<br>I 1.5<br>NC 1.4  | 1.7   | NC 1.4<br>NC 1.7           | 1.5   | NC 1.2<br>NC 4.6           | 0.9   | NC 1.3<br>NC 0.7<br>NC 0.9 | 1.4   | NC 1.2<br>NC 0.9           | 1.2   | NC 1.1<br>NC 2.5<br>NC 0.2 | 0.8   | NC 1.0<br>NC 1.1<br>NC 0.2 | 1.2   | NC 1.0<br>NC 1.1<br>NC 0.3 | 1.1   | NC 0.9<br>NC 0.9<br>NC 0.9 |
| ribosomal protein S11     | 1.0   | NC 1.2                     | 1.0   | NC 1.1                     | 0.9   | NC 1.1                     | 1.1   | NC 1.1                     | 1.1   | NC 1.1                     | 1.1   | NC 1.0                     | 0.8   | NC 1.1                     | 0.8   | NC 1.1                     | 0.8   | NC 1.0                     |
| ribosomal protein S3      | 0.9   | NC 1.3                     | 1.0   | NC 1.1                     | 1.0   | NC 1.1                     | 1.0   | NC 1.2                     | 1.1   | NC 1.1                     | 1.1   | NC 1.1                     | 1.1   | NC 1.1                     | 1.2   | NC 1.1                     | 1.2   | NC 1.0                     |
| alpha-tubulin             | 1.0   | NC 1.6<br>NC 1.4           | 1.0   | I 1.5<br>NC 1.4            | 0.9   | I 1.3<br>NC 1.2            | 1.2   | NC 1.3<br>NC 1.2           | 1.2   | NC 1.2<br>NC 1.2           | 1.1   | NC 1.1<br>NC 1.0           | 1.0   | NC 1.1<br>NC 1.1           | 1.0   | NC 1.1<br>NC 1.1           | 0.9   | NC 1.0<br>NC 0.9           |
| HSP40                     | 1.2   | NC 1.2                     | 1.4   | NC 1.1                     | 0.7   | NC 1.2                     | 1.0   | NC 1.2                     | 1.2   | NC 1.2                     | 0.6   | NC 1.2                     | 2.7   | NC 1.1                     | 3.1   | NC 1.1                     | 1.5   | NC 1.2                     |
| MARCKS-related protein    | 1.2   | NC 0.8                     | 1.4   | NC 0.9                     | 1.0   | NC 0.9                     | 1.4   | NC 0.9                     | 1.7   | NC 1.0                     | 1.3   | NC 1.0                     | 1.2   | NC 1.0                     | 1.4   | NC 1.1                     | 1.1   | NC 1.0                     |
| STY kinase                | 1.3   | NC 1.4                     | 2.0   | I 1.7                      | 1.9   | I 1.6                      | 1.2   | NC 1.0                     | 1.8   | I 1.3                      | 1.7   | NC 1.2                     | 1.1   | NC 1.1                     | 1.7   | I 1.5                      | 1.6   | I 1.3                      |
| hsr.1                     | 1.1   | NC 0.9                     | 1.4   | NC 1.0                     | 1.1   | NC 1.1                     | 1.2   | NC 1.0                     | 1.5   | NC 1.0                     | 1.2   | NC 1.0                     | 0.9   | NC 1.1                     | 1.2   | NC 1.1                     | 0.9   | NC 1.1                     |
| malate dehydrogenase      | 1.1   | NC 1.1                     | 1.2   | NC 1.0                     | 1.2   | NC 1.0                     | 1.2   | NC 1.2                     | 1.2   | NC 1.2                     | 1.3   | NC 1.2                     | 1.0   | NC 0.9                     | 1.0   | NC 0.8                     | 1.0   | NC 1.0                     |

I: Increase D: Decrease NC: No Change
