# Supplementary material
Source: PubMed Central journal article supplement (PMC115302)
Supplement: nar_30_10_e48__3.pdf [file nar_30_10_e48__3.pdf]

**Table 3**

Fold changes of sample pairs as determined by QRT-PCR (Fp) and cDNA microarray (Fa(cDNA))

| Gene                      | E3/C3 |            |      |      | E4/C4 |            |      |      | E5/C5 |            |      |      |
|---------------------------|-------|------------|------|------|-------|------------|------|------|-------|------------|------|------|
|                           | PCR   | cDNA array |      |      | PCR   | cDNA array |      |      | PCR   | cDNA array |      |      |
|                           |       |            |      |      |       |            |      |      |       |            |      |      |
| LRG-21                    | 50.8  | 13.6       | 12.3 | 11.4 | 208.3 | 34.5       | 30.0 | 42.6 | 102.1 | 56.6       | 62.8 | 45.1 |
| egr1                      | 406.9 | 6.2        | 6.4  | 7.7  | 277.8 | 16.7       | 15.3 | 16.4 | 227.8 | 21.1       | 18.7 | 19.3 |
| Nr4a1 (nur77)             | 46.7  | 4.0        | 4.2  | 4.5  | 30.6  | 4.6        | 5.7  | 5.6  | 51.6  | 10.0       | 9.9  | 10.3 |
| ler2 (Pip92)              | 20.3  | 3.9        | 4.3  | 4.8  | 14.1  | 3.6        | 4.5  | 4.1  | 15.0  | 10.0       | 9.4  | 6.1  |
| RGS2                      | 7.4   | 2.4        | 2.7  | 2.7  | 7.8   | 3.9        | 3.4  | 3.3  | 7.1   | 6.7        | 7.1  | 12.4 |
|                           | 7.4   | 0.8        | 2.1  | 0.7  | 7.8   | 3.6        | 6.5  | 3.9  | 7.1   | 5.3        | 4.6  | 5.1  |
| c-jun                     | 6.0   | 3.1        | 3.0  | 2.6  | 6.4   | 3.9        | 3.7  | 3.5  | 4.8   | 6.0        | 7.7  | 6.7  |
| TSC22                     | 2.3   | 2.6        | 2.5  | 2.8  | 3.4   | 4.0        | 4.0  | 4.1  | 3.8   | 4.0        | 4.0  | 4.1  |
|                           | 2.3   | 2.2        | 2.4  | 2.4  | 3.4   | 5.2        | 5.3  | 3.1  | 3.8   | 3.9        | 3.9  | 4.0  |
| gamma-actin               | 2.8   | 2.3        | 2.1  | 2.1  | 4.3   | 2.6        | 2.6  | 2.7  | 5.0   | 3.8        | 3.6  | 3.9  |
| beta-actin                | 1.4   | 1.1        | 0.9  | 1.0  | 2.2   | 1.3        | 1.3  | 1.1  | 1.9   | 2.2        | 2.2  | 2.1  |
|                           | 1.4   | 1.4        | 1.4  | 1.3  | 2.2   | 3.0        | 3.1  | 2.9  | 1.9   | 2.4        | 2.2  | 2.5  |
| KLF4                      | 3.1   | 1.2        | 1.4  | 1.3  | 3.2   | 1.6        | 1.8  | 1.9  | 2.3   | 1.9        | 1.6  | 2.2  |
| Period1                   | 3.9   | 1.8        | 1.7  | 1.8  | 3.8   | 2.2        | 2.2  | 2.3  | 3.1   | 1.9        | 2.1  | 2.1  |
| Ptp4a1                    | 1.8   | 1.0        | 0.9  | 0.9  | 2.2   | 1.4        | 1.6  | 1.7  | 2.3   | 2.8        | 2.7  | 2.7  |
|                           | 1.8   | 1.3        | 1.1  | 1.4  | 2.2   | 2.4        | 3.0  | 2.6  | 2.3   | 2.8        | 2.7  | 2.6  |
| gly96                     | 3.7   | 1.4        | 1.7  | 1.2  | 3.1   | 0.8        | 1.3  | 1.3  | 4.2   | 2.5        | 4.3  | 2.4  |
| I-kappa B                 | 2.5   | 1.5        | 1.6  | 1.6  | 2.5   | 1.5        | 1.6  | 1.7  | 1.5   | 1.8        | 1.6  | 1.6  |
| Gem                       | 3.1   | 1.2        | 1.2  | 1.5  | 4.0   | 2.2        | 2.0  | 1.5  | 3.9   | 1.8        | 1.7  | 2.2  |
| egr2                      | 288.3 | 1.1        | 1.4  | 1.4  | 167.8 | 1.3        | 1.6  | 1.3  | 372.4 | 2.5        | 2.5  | 2.8  |
| ptpn16 (MKP1)             | 3.6   | 1.4        | 1.4  | 1.6  | 2.4   | 1.0        | 1.3  | 1.2  | 2.6   | 2.1        | 1.4  | 1.7  |
| SCL                       | 1.9   | 0.8        | 0.8  | 0.9  | 2.3   | 0.9        | 1.0  | 0.7  | 2.4   | 1.4        | 1.4  | 1.4  |
| glucose transport protein | 1.2   | 0.7        | 0.8  | 0.7  | 2.8   | 1.0        | 1.0  | 0.7  | 2.9   | 2.4        | 2.5  | 2.4  |
| junD                      | 1.3   | 1.5        | 1.7  | 1.4  | 1.9   | 1.4        | 1.5  | 1.5  | 1.1   | 2.8        | 2.4  | 2.7  |
| mthfd2                    | 1.1   | 1.0        | 0.9  | 0.9  | 1.4   | 1.7        | 1.8  | 1.9  | 1.6   | 1.5        | 1.6  | 1.5  |
| Stat3B                    | 1.3   | 1.3        | 1.1  | 0.9  | 1.1   | 1.6        | 1.6  | 1.8  | 1.6   | 1.4        | 1.4  | 1.2  |
| Nrf2                      | 1.1   | 0.9        | 1.1  | 1.2  | 1.1   | 1.6        | 1.8  | 1.7  | 1.5   | 1.3        | 1.3  | 1.4  |
|                           | 1.1   | 1.2        | 1.0  | 1.2  | 1.1   | 1.5        | 1.5  | 1.5  | 1.5   | 1.4        | 1.3  | 1.5  |
| Gata2                     | 1.0   | 0.8        | 0.7  | 0.8  | 0.5   | 0.6        | 0.5  | 0.6  | 1.0   | 0.9        | 1.0  | 0.9  |
| Gata6                     | 0.7   | 1.0        | 1.1  | 1.0  | 0.6   | 0.8        | 0.7  | 0.7  | 0.5   | 0.8        | 0.8  | 0.6  |
| chloride channel 3        | 1.0   | 1.2        | 1.2  | 1.2  | 1.2   | 1.4        | 1.3  | 1.5  | 1.5   | 1.3        | 1.3  | 1.4  |
| Cox8a                     | 1.1   | 1.0        | 1.1  | 1.2  | 0.9   | 0.6        | 0.7  | 0.7  | 0.9   | 1.1        | 1.1  | 1.1  |
| elongation factor 2       | 3.4   | 1.0        | 1.1  | 1.0  | 1.1   | 1.3        | 1.2  | 1.3  | 0.5   | 1.1        | 1.2  | 1.1  |
| fatty acid synthase       | 2.0   | 1.3        | 1.3  | 1.5  | 0.9   | 1.2        | 1.2  | 1.1  | 0.7   | 1.3        | 1.5  | 1.4  |
| G-binding protein         | 0.9   | 1.1        | 1.2  | 1.1  | 0.9   | 1.1        | 1.1  | 1.1  | 1.1   | 1.1        | 1.1  | 1.1  |
| growth factor-induced     | 0.8   | 0.8        | 0.9  | 0.8  | 0.8   | 0.6        | 0.6  | 0.6  | 1.0   | 1.4        | 1.3  | 1.4  |
| Hdac1                     | 0.9   | 1.0        | 1.0  | 1.0  | 0.9   | 1.1        | 1.5  | 1.6  | 1.1   | 0.9        | 0.9  | 0.9  |
|                           | 1.4   | 1.1        | 1.1  | 1.1  | 0.9   | 1.0        | 1.0  | 1.0  | 1.2   | 1.1        | 1.2  | 1.1  |
| HSP86-1                   | 1.4   | 1.0        | 0.8  | 0.8  | 0.9   | 1.3        | 1.3  | 0.8  | 1.2   | 1.1        | 1.0  | 1.1  |
| Na,K-ATPase               | 0.9   | 0.7        | 0.6  | 0.9  | 1.4   | 1.1        | 1.4  | 1.1  | 1.3   | 1.4        | 1.5  | 1.4  |
| 26S proteasome            | 1.0   | 0.9        | 1.0  | 0.9  | 0.9   | 1.1        | 1.0  | 1.0  | 1.0   | 0.9        | 0.8  | 0.8  |
| PRL2                      | 1.0   | 1.0        | 1.0  | 1.0  | 1.5   | 0.8        | 0.8  | 0.8  | 1.2   | 1.1        | 1.2  | 1.2  |
| small GTP-binding protein | 1.1   | 1.0        | 1.0  | 1.0  | 1.2   | 0.8        | 0.8  | 0.8  | 1.2   | 1.0        | 1.2  | 1.0  |
| ribosomal protein L37     | 0.9   | 0.8        | 0.7  | 0.8  | 0.9   | 1.0        | 1.0  | 0.8  | 1.1   | 1.0        | 0.9  | 1.0  |
| ribosomal protein L7      | 1.1   | 0.9        | 0.9  | 0.9  | 1.2   | 1.0        | 1.2  | 1.0  | 1.3   | 0.9        | 0.9  | 0.9  |
| ribosomal protein S11     | 0.8   | 1.1        | 1.1  | 1.0  | 0.8   | 1.1        | 1.0  | 1.0  | 1.1   | 0.9        | 1.0  | 0.9  |
| ribosomal protein S3      | 1.2   | 0.8        | 0.9  | 0.8  | 1.1   | 1.1        | 1.2  | 1.0  | 1.1   | 0.9        | 1.0  | 0.9  |
| alpha-tubulin             | 0.9   | 1.2        | 1.2  | 1.2  | 0.9   | 0.9        | 1.0  | 1.0  | 1.0   | 1.2        | 1.2  | 1.2  |
| HSP40                     | 1.5   | 1.2        | 1.1  | 1.3  | 1.2   | 1.2        | 1.2  | 1.3  | 1.3   | 2.0        | 1.6  | 1.7  |
| MARCKS-related protein    | 1.1   | 1.1        | 1.1  | 1.2  | 1.0   | 1.0        | 1.1  | 0.9  | 1.1   | 1.1        | 1.1  | 1.1  |
| STY Kinase                | 1.6   | 1.2        | 1.3  | 1.2  | 1.3   | 1.4        | 1.3  | 1.3  | 1.4   | 1.2        | 1.2  | 1.4  |
| hsr.1                     | 0.9   | 1.0        | 1.0  | 1.1  | 1.1   | 0.8        | 0.8  | 0.8  | 1.1   | 1.2        | 1.1  | 1.2  |
| malate dehydrogenase      | 1.0   | 1.0        | 1.0  | 1.1  | 0.9   | 1.0        | 1.0  | 1.1  | 1.2   | 0.8        | 0.9  | 0.8  |
